# Supplementary material for: Two novel uranyl complexes of a semi-rigid aromatic tetracarboxylic acid supported by an organic base as an auxiliary ligand or a templating agent: an experimental and theoretical exploration
Source: Royal Society of Chemistry journal article supplement (doi:10.1039/c5ce00223k), 2015-01-01
Supplement: c5ce00223k1.pdf [file c5ce00223k1.pdf]

# Two Novel Uranyl Complexes of Semi-rigid Aromatic Tetracarboxylic Acid Supported by Organic Base as Auxiliary Ligand or Templating Agent: an Experimental and Theoretical Exploration

Liu-Zheng Zhu,<sup>a,b,†</sup> Cong-Zhi Wang,<sup>b,†</sup> Lei Mei,<sup>b</sup> Lin Wang,<sup>b</sup> Yun-Hai Liu,<sup>\*a</sup> Zhen-Tai Zhu,<sup>d</sup> Yu-Liang Zhao,<sup>b</sup> Zhi-Fang Chai,<sup>b,c</sup> and Wei-Qun Shi<sup>\*b</sup>

## Supporting Information

### Table of contents

|               |                                                                                                                                                                                                                                              |      |
|---------------|----------------------------------------------------------------------------------------------------------------------------------------------------------------------------------------------------------------------------------------------|------|
| <b>Scheme</b> | <b>S1.</b> The different coordination modes of bptc <sup>4-</sup> ligand in <b>1</b> and <b>2</b> ...                                                                                                                                        | 2    |
| <b>Figure</b> | <b>S1.</b> The TGA diagrams of complex <b>1</b> .....                                                                                                                                                                                        | 3    |
| <b>Figure</b> | <b>S2.</b> The TGA diagrams of complex <b>2</b> .....                                                                                                                                                                                        | 3    |
| <b>Figure</b> | <b>S3.</b> The IR spectra of complex <b>1</b> and <b>2</b> .....                                                                                                                                                                             | 4    |
| <b>Figure</b> | <b>S4.</b> Powder X-ray diffraction patterns of complex <b>1</b> .....                                                                                                                                                                       | 4    |
| <b>Figure</b> | <b>S5.</b> Powder X-ray diffraction patterns of complex <b>2</b> .....                                                                                                                                                                       | 5    |
| <b>Figure</b> | <b>S6.</b> Solid-state fluorescence spectra of complex <b>1</b> , <b>2</b> and uranyl nitrate ( $\lambda_{\text{ex}}=310\text{nm}$ ).....                                                                                                    | 5    |
| <b>Table</b>  | <b>S1.</b> Selected Calculated and Experimental Bond Lengths (Å) of the U-O Bonds, Mayer Bond Order, and the Electron Density ( $\rho$ , a.u.) at U-O Bond Critical Points for the Model Fragments of Complex <b>1</b> .....                 | 6    |
| <b>Table</b>  | <b>S2.</b> Selected Calculated and Experimental Bond Lengths (Å) of the U-O and U-N Bonds, Mayer Bond Order, and the Electron Density ( $\rho$ , a.u.) at U-O and U-N Bond Critical Points for the Model Fragments of Complex <b>2</b> ..... | 6    |
| <b>Table</b>  | <b>S3.</b> Percent Contribution of the U-O and U-N Bonding in Complexes <b>1</b> and <b>2</b> .....                                                                                                                                          | 7-10 |

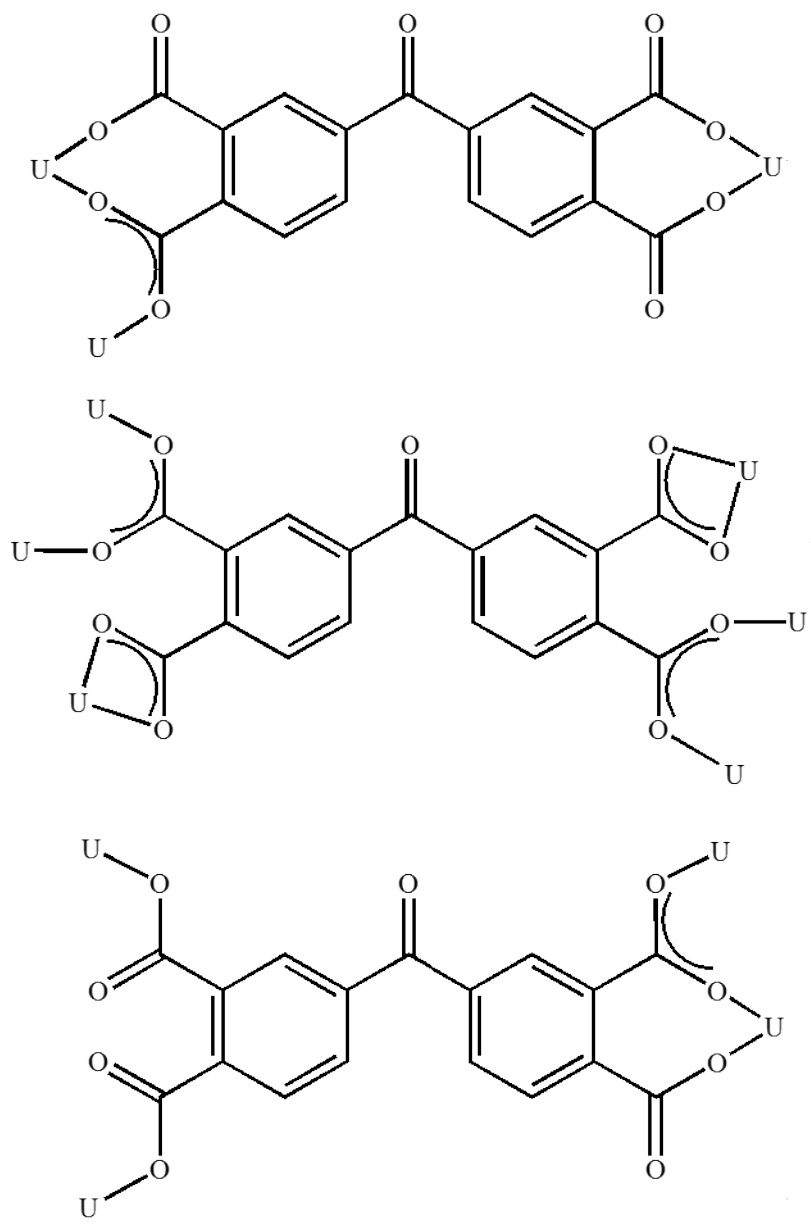

**Scheme S1.** The different coordination modes of bptc<sup>4-</sup> ligand in **1** and **2**

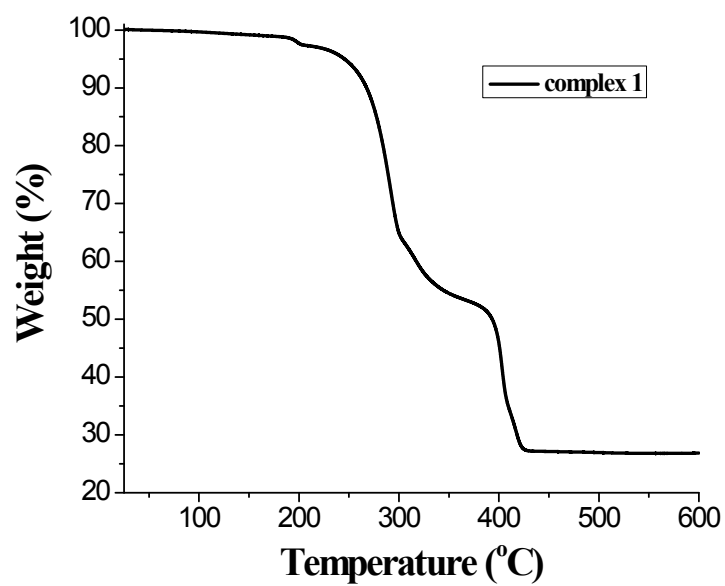

**Fig. S1.** The TGA diagrams of complex 1.

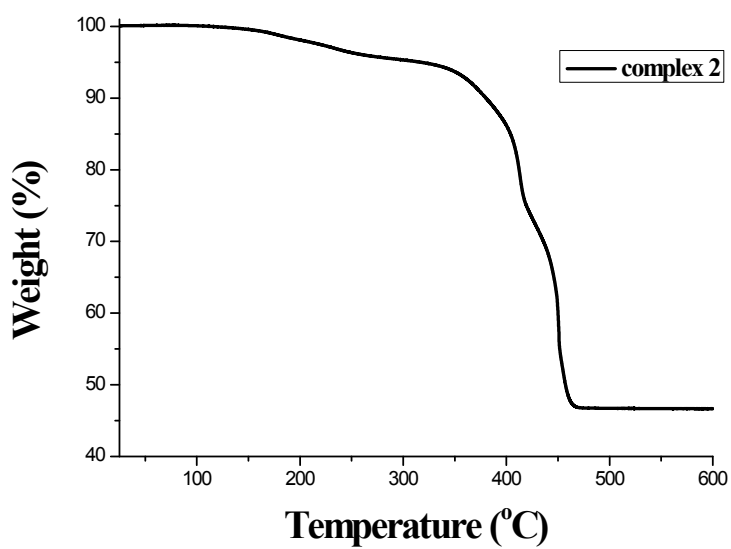

**Fig. S2.** The TGA diagrams of complex 2.

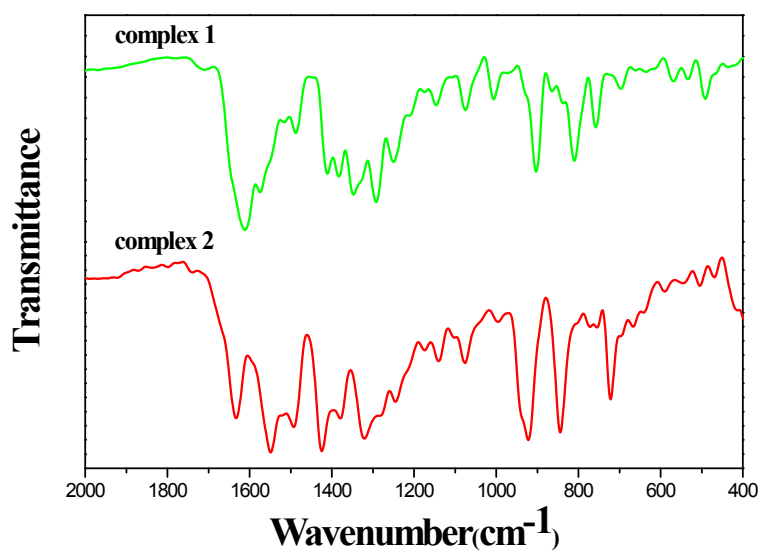

Fig. S3. The IR spectra of complex 1 and 2.

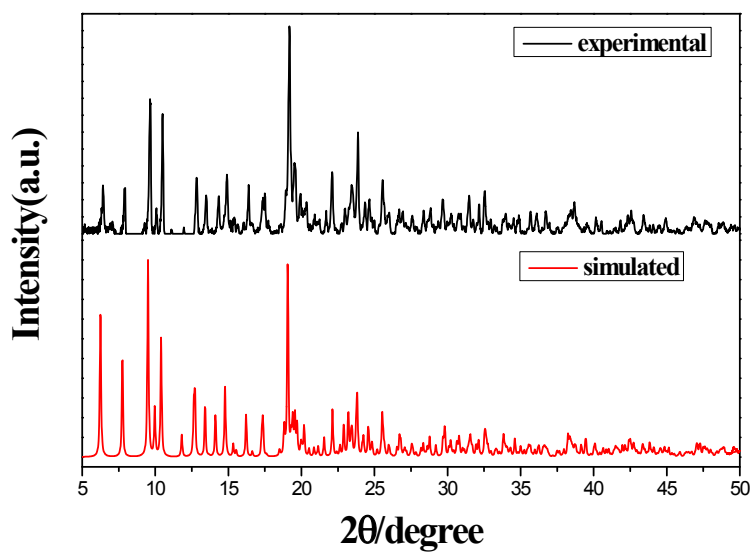

Fig. S4. Powder X-ray diffraction patterns of complex 1.

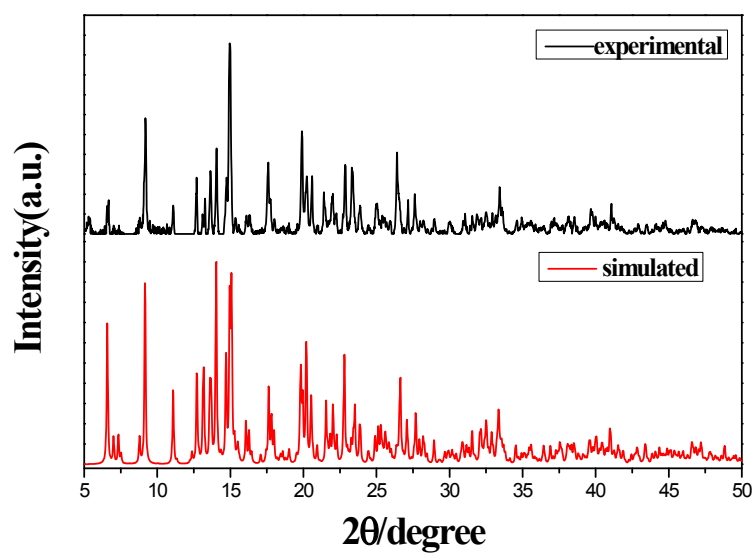

Fig. S5. Powder X-ray diffraction patterns of complex 2.

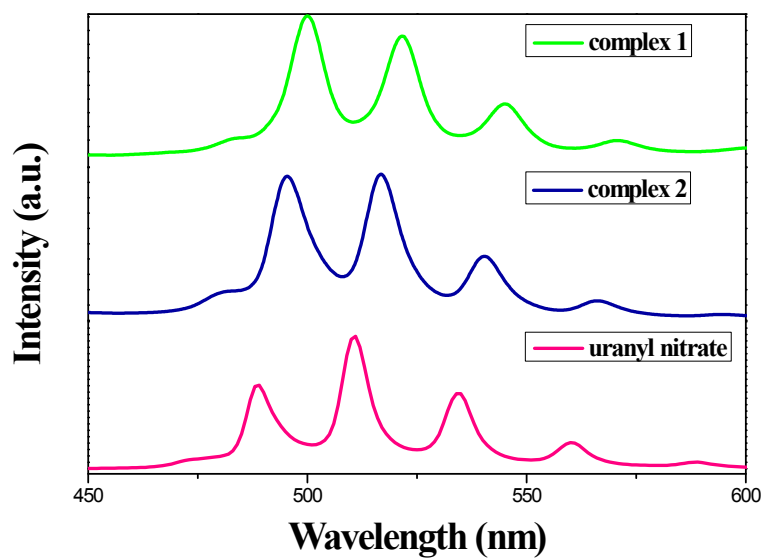

Fig. S6. Solid-state fluorescence spectra of complex 1, 2 and uranyl nitrate ( $\lambda_{ex}=310\text{nm}$ ).

**Table S1.** Selected Calculated and Experimental Bond Lengths (Å) of the U-O Bonds, Mayer Bond Order, and the Electron Density ( $\rho$ , a.u.) at U-O Bond Critical Points for the Model Fragments of Complex 1.

| Complex 1        |       | U1=O1    | U1=O2    | U1-O3    | U1-O5    | U1-O7    | U1-O9    | U1-O10   |
|------------------|-------|----------|----------|----------|----------|----------|----------|----------|
| Bond Lengths     | Calc. | 1.788    | 1.788    | 2.376    | 2.385    | 2.345    | 2.412    | 2.417    |
|                  | Exp.  | 1.784(4) | 1.774(4) | 2.328(4) | 2.319(5) | 2.364(4) | 2.417(5) | 2.383(4) |
| Mayer Bond Order |       | 2.053    | 2.055    | 0.470    | 0.458    | 0.506    | 0.407    | 0.396    |
| $\rho$           |       | 0.2894   | 0.2895   | 0.0652   | 0.0634   | 0.0698   | 0.0575   | 0.0589   |
|                  |       | U1'=O1'  | U1'=O2'  | U1'-O3'  | U1'-O5'  | U1'-O7'  | U1'-O9'  | U1'-O10' |
| Bond Lengths     | Calc. | 1.787    | 1.787    | 2.399    | 2.388    | 2.342    | 2.415    | 2.400    |
|                  | Exp.  | 1.784(4) | 1.774(4) | 2.328(4) | 2.319(5) | 2.364(4) | 2.417(5) | 2.383(4) |
| Mayer Bond Order |       | 2.059    | 2.063    | 0.440    | 0.448    | 0.504    | 0.396    | 0.401    |
| $\rho$           |       | 0.2901   | 0.2901   | 0.0616   | 0.0627   | 0.0695   | 0.0566   | 0.0600   |

**Table S2.** Selected Calculated and Experimental Bond Lengths (Å) of the U-O and U-N Bonds, Mayer Bond Order, and the Electron Density ( $\rho$ , a.u.) at U-O and U-N Bond Critical Points for the Model Fragments of Complex 2.

| Complex 2-U1     |       | U1=O13  | U1=O14  | U1-O7    | U1-O11   | U1-O12   | U1-N3    | U1-N4   |
|------------------|-------|---------|---------|----------|----------|----------|----------|---------|
| Bond Lengths     | Calc. | 1.789   | 1.789   | 2.340    | 2.284    | 2.369    | 2.662    | 2.658   |
|                  | Exp.  | 1.77(1) | 1.77(1) | 2.31(1)  | 2.279(9) | 2.369(7) | 2.640(9) | 2.61(1) |
| Mayer Bond Order |       | 2.049   | 2.068   | 0.463    | 0.565    | 0.424    | 0.305    | 0.310   |
| $\rho$           |       | 0.2891  | 0.2887  | 0.0693   | 0.0779   | 0.0640   | 0.0511   | 0.0435  |
| Complex 2-U2     |       | U2=O1   | U2=O2   | U2-O3    | U2-O4    | U2-O5    | U2-N1    | U2-N2   |
| Bond Lengths     | Calc. | 1.785   | 1.785   | 2.455    | 2.481    | 2.255    | 2.591    | 2.619   |
|                  | Exp.  | 1.77(1) | 1.76(1) | 2.410(9) | 2.436(9) | 2.26(1)  | 2.523(9) | 2.56(1) |
| Mayer Bond Order |       | 2.086   | 2.065   | 0.442    | 0.390    | 0.595    | 0.330    | 0.321   |
| $\rho$           |       | 0.2920  | 0.2919  | 0.0598   | 0.0564   | 0.0808   | 0.0511   | 0.0482  |
| Complex 2-U3     |       | U3=O18  | U3=O19  | U3-O16   | U3-O17   | U3-O20   | U3-O21   | U3-O22  |
| Bond Lengths     | Calc. | 1.816   | 1.801   | 2.518    | 2.252    | 2.454    | 2.518    | 2.528   |
|                  | Exp.  | 1.75(1) | 1.74(1) | 2.34(2)  | 2.38(2)  | 2.37(1)  | 2.41(1)  | 2.48(2) |
| Mayer Bond Order |       | 1.863   | 2.055   | 0.352    | 0.628    | 0.372    | 0.361    | 0.272   |
| $\rho$           |       | 0.2674  | 0.2790  | 0.0407   | 0.0787   | 0.0543   | 0.0480   | 0.0468  |

**Table S3.** Percent Contribution of the U-O and U-N Bonding in Complexes **1** and **2**.

| Species          | Orbitals | Element | Contributions of Each Atomic Orbital (%) |    |    |    |
|------------------|----------|---------|------------------------------------------|----|----|----|
|                  |          |         | 2p                                       | 5f | 6d | 7p |
| Complex <b>1</b> | a        | U1      |                                          | 2  | 3  |    |
|                  |          | U1'     |                                          | 4  |    | 1  |
|                  |          | O3'     | 2                                        |    |    |    |
|                  |          | O5'     | 2                                        |    |    |    |
|                  |          | O7'     | 3                                        |    |    |    |
|                  |          | O9      | 7                                        |    |    |    |
|                  |          | O9'     | 12                                       |    |    |    |
|                  |          | O10     | 5                                        |    |    |    |
|                  |          | O10'    | 16                                       |    |    |    |
|                  |          | U1      |                                          |    | 1  |    |
|                  | U1'      |         |                                          | 4  |    |    |
|                  | O3       | 4       |                                          |    |    |    |
|                  | O3'      | 5       |                                          |    |    |    |
|                  | O5       | 5       |                                          |    |    |    |
|                  | O5'      | 11      |                                          |    |    |    |
|                  | O7       | 3       |                                          |    |    |    |
|                  | O7'      | 7       |                                          |    |    |    |
|                  | O9       | 2       |                                          |    |    |    |
|                  | O9'      | 2       |                                          |    |    |    |
|                  | O10      | 3       |                                          |    |    |    |
|                  | O10'     | 5       |                                          |    |    |    |
|                  | U1       |         |                                          | 3  | 1  |    |
|                  | U1'      |         |                                          | 4  | 1  | 1  |
|                  | O3       | 7       |                                          |    |    |    |
|                  | O3'      | 13      |                                          |    |    |    |
|                  | O7       | 2       |                                          |    |    |    |
|                  | O7'      | 1       |                                          |    |    |    |
|                  | O9       | 7       |                                          |    |    |    |
|                  | O10      | 4       |                                          |    |    |    |
|                  | O10'     | 2       |                                          |    |    |    |
| U1               |          |         | 3                                        |    |    |    |
| U1'              |          |         | 2                                        |    |    |    |
| O3               | 5        |         |                                          |    |    |    |
| O3'              | 2        |         |                                          |    |    |    |
| O5               | 1        |         |                                          |    |    |    |
| O5'              | 7        |         |                                          |    |    |    |
| O7'              | 6        |         |                                          |    |    |    |

---

|   |      |    |   |   |
|---|------|----|---|---|
|   | O9'  | 14 |   |   |
|   | O10  | 20 |   |   |
|   | O10' | 2  |   |   |
|   | U1   |    | 2 |   |
|   | U1'  |    | 2 |   |
|   | O3   | 1  |   |   |
|   | O3'  | 7  |   |   |
| e | O5   | 7  |   |   |
|   | O7   | 8  |   |   |
|   | O9   | 9  |   |   |
|   | O10  | 2  |   |   |
|   | O10' | 14 |   |   |
|   | U1   |    | 4 | 1 |
|   | U1'  |    | 3 |   |
|   | O3   | 8  |   |   |
|   | O3'  | 8  |   |   |
|   | O5   | 6  |   |   |
| f | O5'  | 5  |   |   |
|   | O7'  | 1  |   |   |
|   | O9   | 12 |   |   |
|   | O9'  | 2  |   |   |
|   | O10  | 2  |   |   |
|   | O10' | 12 |   |   |
|   | U3   |    | 1 |   |
|   | O16  | 2  |   |   |
| a | O20  | 5  |   |   |
|   | O21  | 20 |   |   |
|   | O22  | 41 |   |   |
|   | U3   |    | 9 | 2 |
|   | O16  | 2  |   |   |
| b | O17  | 13 |   |   |
|   | O20  | 3  |   |   |
|   | O21  | 2  |   |   |
|   | U3   |    | 5 | 1 |
| c | O16  | 2  |   |   |
|   | O17  | 13 |   |   |
|   | O20  | 3  |   |   |
|   | U3   |    | 3 | 1 |
| d | O16  | 5  |   |   |
|   | O17  | 7  |   |   |

---



---

|   |     |    |    |   |   |
|---|-----|----|----|---|---|
|   | O20 | 8  |    |   |   |
|   | U1  |    | 24 |   | 5 |
|   | N1  | 5  |    |   |   |
| e | O3  | 5  |    |   |   |
|   | O4  | 4  |    |   |   |
|   | O5  | 4  |    |   |   |
|   | U2  |    | 7  |   | 2 |
| f | N1  | 2  |    |   |   |
|   | O3  | 4  |    |   |   |
|   | O4  | 1  |    |   |   |
|   | U2  |    | 2  |   |   |
|   | N1  | 3  |    |   |   |
|   | N2  | 6  |    |   |   |
| g | O3  | 7  |    |   |   |
|   | O4  | 11 |    |   |   |
|   | O5  | 7  |    |   |   |
|   | U2  |    | 2  | 1 | 2 |
|   | N1  | 6  |    |   |   |
|   | N2  | 2  |    |   |   |
| h | O3  | 3  |    |   |   |
|   | O4  | 17 |    |   |   |
|   | O5  | 36 |    |   |   |
|   | U1  |    | 19 |   | 4 |
|   | N4  | 1  |    |   |   |
| i | O7  | 2  |    |   |   |
|   | O11 | 1  |    |   |   |
|   | O12 | 3  |    |   |   |
|   | U1  |    | 3  |   | 1 |
|   | N3  | 1  |    |   |   |
| j | N4  | 2  |    |   |   |
|   | O11 | 3  |    |   |   |
|   | O12 | 8  |    |   |   |
|   | U1  |    | 1  |   | 3 |
|   | N3  | 6  |    |   |   |
| k | O7  | 14 |    |   |   |
|   | O11 | 4  |    |   |   |
|   | O12 | 10 |    |   |   |
|   | U1  |    | 3  |   |   |
| l | O7  | 13 |    |   |   |
|   | O11 | 7  |    |   |   |
|   | O12 | 3  |    |   |   |

---
